# Supplementary material
Source: PubMed Central journal article supplement (PMC3234375)
Supplement: mmc1.pdf [file mmc1.pdf]

The American Journal of Human Genetics, Volume 89

## Supplemental Data

**Biallelic Mutations in *PLA2G5*,**

**Encoding Group V Phospholipase A<sub>2</sub>,**

**Cause Benign Fleck Retina**

**Panagiotis I. Sergouniotis, Alice E. Davidson, Donna S. Mackay, Eva Lenassi, Zheng Li, Anthony G. Robson, Xu Yang, Jaimie Hoh Kam, Timothy W. Isaacs, Graham E. Holder, Glen Jeffery, Jonathan A. Beck, Anthony T. Moore, Vincent Plagnol, and Andrew R. Webster**

Figure S1. Multiple Alignment of Nine Mammalian *PLA2G5* Orthologs

|                              |             |             |             |             |             |             |
|------------------------------|-------------|-------------|-------------|-------------|-------------|-------------|
| <i>Homo sapiens</i>          | MKGLLPLAWF  | LACSVPAVQG  | GLLDLKSMIE  | KVTGKNALTN  | YGFYGCYCGW  | GGRGTPKDGT  |
| <i>Pan troglodytes</i>       | MKGLLPLAWF  | LACSVPAVQG  | GLLDLKSMIE  | KVTGKNALTN  | YGFYGCYCGW  | GGRGTPKDGT  |
| <i>Callithrix jacchus</i>    | MKGLLPLAWF  | LACSVPAVQG  | GLLDLKSMIE  | KVTGKNALKN  | YGFYGCYCGW  | GGHGTPKDGT  |
| <i>Bos taurus</i>            | MKGLLMLAWF  | LACSVPAVPG  | SLLDLKSMIE  | KVTGKPALKY  | YGFYGCYCGW  | GGHGTPMDGT  |
| <i>Canis familiaris</i>      | MNGLLTLAWL  | LACCVRAVPG  | GLLDLKSMIE  | KVTGKSALTN  | YGFYGCYCGW  | GGRGTPKDGT  |
| <i>Mus musculus</i>          | MKGLLTLAWF  | LACSVPAVPG  | GLLELKSMIE  | KVTRKNAFKN  | YGFYGCYCGW  | GGRGTPKDGT  |
| <i>Rattus norvegicus</i>     | MKRLTLAWF   | LACSVPAVPG  | GLLELKSMIE  | KVTGKNAVKN  | YGFYGCYCGW  | GGHGTPKDGT  |
| <i>Oryctolagus cuniculus</i> | MKGLLTLAWF  | LACGVPVAVPG | SLLDLKSMIE  | KVTGKNALTN  | YGFYGCYCGW  | GGRGTPMDGT  |
| <i>Pteropus vampyrus</i>     | MKSLTLAWF   | LACSVPTVPG  | GLLELKSMIK  | TVTGKNALIN  | YGFYGCYCGW  | GGHGTPKDGT  |
|                              | ..... ..... | ..... ..... | ..... ..... | ..... ..... | ..... ..... | ..... ..... |
|                              | 65          | 75          | 85          | 95          | 105         | 115         |
| <i>Homo sapiens</i>          | DWCCWAHDHC  | YGRLEEKGCN  | IRTQSYKYRF  | AWGVVTCEPG  | PFCHVNLACAC | DRKLVYCLKR  |
| <i>Pan troglodytes</i>       | DWCCWAHDHC  | YGRLEEKGCN  | IRTQSYKYRF  | AWGVVTCEPG  | PFCHVKLCAC  | DRKLVYCLKR  |
| <i>Callithrix jacchus</i>    | DWCCWVHDHC  | YGRLEEKGCN  | IWTQSYKYRF  | AWGLVTCEPG  | SFCRVQLCAC  | DRKLVYCLKR  |
| <i>Bos taurus</i>            | DWCCWKHDHC  | YAQMETQDCD  | VLTQAYRYRV  | AWGFIICEHG  | SRCQQQLCAC  | DQKFVYCLKR  |
| <i>Canis familiaris</i>      | DWCCWVHDRC  | YGRLEEKGCN  | IRTQSYKYRF  | AQGLVTCEYG  | PLCQMQLCTC  | DRKLVYCLKR  |
| <i>Mus musculus</i>          | DWCCQMHDRC  | YGQLEEKDCA  | IRTQSYDYRY  | TNGLVICEHD  | SFCPMRLCAC  | DRKLVYCLRR  |
| <i>Rattus norvegicus</i>     | DWCCRMHDRC  | YGLLEEKHCA  | IRTQSYDYRF  | TQDLVICEHD  | SFCPVRLCAC  | DRKLVYCLRR  |
| <i>Oryctolagus cuniculus</i> | DWCCWVHDKC  | YGRLEERACN  | IRTQSYKYRF  | ARGLVTCELG  | SLCQMLLCTC  | DRKFVYCLKR  |
| <i>Pteropus vampyrus</i>     | DWCCWVHDRC  | YEWLEEKGCY  | YRTQSYKYRV  | TRGLVTCELG  | PLCQVELCAC  | DRKLVYCLNR  |
|                              | ..... ..... | ..... ..... |             |             |             |             |
|                              | 125         | 135         |             |             |             |             |
| <i>Homo sapiens</i>          | NLRSYNPQYQ  | YFPNILCS    |             |             |             |             |
| <i>Pan troglodytes</i>       | NLRSYNPQYQ  | YFPNILCS    |             |             |             |             |
| <i>Callithrix jacchus</i>    | NLWSYNPRYQ  | YFPNILCF    |             |             |             |             |
| <i>Bos taurus</i>            | NMRSYNPLYQ  | YFPNFLCT    |             |             |             |             |
| <i>Canis familiaris</i>      | NLRSYNPHYQ  | YFPNILCS    |             |             |             |             |
| <i>Mus musculus</i>          | NLWTYNPLYQ  | YYPNFLC-    |             |             |             |             |
| <i>Rattus norvegicus</i>     | NLWSYNRLYQ  | YYPNFLC-    |             |             |             |             |
| <i>Oryctolagus cuniculus</i> | NLWSYNPHYR  | YYPNFFCT    |             |             |             |             |
| <i>Pteropus vampyrus</i>     | NLRSYNPGYR  | FFPNIFCT    |             |             |             |             |

The alignment is numbered in accordance with *Homo sapiens* group V phospholipase A<sub>2</sub> sequence (ENST00000375108). The positions of mutated residues, Gly45 (c.133 G>T, p.Gly45Cys in families J and M) and Gly49 (c.145 G>A, p.Gly49Ser in family L), are highlighted in bold white font. The position of the Ca<sup>2+</sup> binding loop and active site are highlighted in grey consecutively. The PLA2G5 protein is evolutionarily the newest secreted phospholipase A<sub>2</sub> family member; *PLA2G5* orthologs have only been identified in mammals.<sup>11</sup> The alignment was performed with ClustalW using the following Ensembl transcripts: *Homo sapiens*, ENST00000375108; *Pan troglodytes*, ENSPTRT00000000558; *Callithrix jacchus*, ENSCJAT00000054887; *Bos Taurus*, ENSBTAT00000052261; *Canis familiaris*, ENSCAFT00000023974; *Mus musculus*, ENSMUST00000102511; *Rattus norvegicus*, ENSRNOT00000022716; *Oryctolagus cuniculus*, ENSOCUT00000008354; *Pteropus vampyrus*, ENSPVAT00000011947.

Figure S2. Multiple Alignment of Conventional Secreted Phospholipase A<sub>2</sub> Proteins (Groups I/II/V/X) around Residues Mutated in Patients with Benign Fleck Retina

|                            |            |             |                                                    |             |            |
|----------------------------|------------|-------------|----------------------------------------------------|-------------|------------|
| Group V PLA <sub>2</sub>   | LKSMIEK-VT | GKNALTNYGF  | <b>YG</b> <b>CY</b> <b>C</b> <b>G</b> WGGR         | GTPKDGTDWC  | CWAHDHCYGR |
| Group IB PLA <sub>2</sub>  | FRKMIKCVIP | GSDPFLEYNN  | <b>YG</b> <b>CY</b> <b>C</b> <b>G</b> LGGS         | GTPVDELDKC  | CQTHDNCYDQ |
| Group IIA PLA <sub>2</sub> | FHRMIKL-TT | GKEAALS YGF | <b>YG</b> <b>CH</b> <b>C</b> <b>G</b> VGGR         | GSPKDATDRC  | CVTHDCCYKR |
| Group IIC PLA <sub>2</sub> | FQRRVKH-IT | GRSAFFSYYG  | <b>YG</b> <b>CY</b> <b>C</b> <b>G</b> LGDK         | GIPVDDTDRH  | SPSSPSPYEK |
| Group IID PLA <sub>2</sub> | LNKMVKQ-VT | GKMPILSYWP  | <b>YG</b> <b>CH</b> <b>C</b> <b>G</b> LGGR         | GQPKDATDWC  | CQTHDCCYDH |
| Group IIE PLA <sub>2</sub> | FGVMIEK-MT | GKS-ALQYND  | <b>YG</b> <b>CY</b> <b>C</b> <b>G</b> IGGS         | HWPVDQTDWC  | CHAHDCCYGR |
| Group IIF PLA <sub>2</sub> | LKAMVEA-VT | GRSAILS FVG | <b>YG</b> <b>CY</b> <b>C</b> <b>G</b> LGGR         | GQPKDEV DWC | CHAHDCCYQE |
| Group X PLA <sub>2</sub>   | LAGTVG--CV | GPRTPIAYMK  | <b>YG</b> <b>C</b> <b>F</b> <b>C</b> <b>G</b> LGGH | GQPRDAIDWC  | CHGHDCCYTR |

Mutated group V phospholipase A<sub>2</sub> (PLA<sub>2</sub>) amino acid residues, Gly45 (c.133 G>T, p.Gly45Cys in families J and M) and Gly49 (c.145 G>A, p.Gly49Ser in family L), are highlighted in bold white font. The position of the Ca<sup>2+</sup> binding loop and active site are highlighted in grey consecutively. The alignment was performed with ClustalW using the following Ensembl transcripts: group IB PLA<sub>2</sub>, ENST00000308366; group IIA PLA<sub>2</sub>, ENST00000375111; group IIC PLA<sub>2</sub>, ENST00000429261; group IID PLA<sub>2</sub>, ENST00000375105; group IIE PLA<sub>2</sub>, ENST00000375116; group IIF PLA<sub>2</sub>, ENST00000375102; group V PLA<sub>2</sub>, ENST00000375108; group X PLA<sub>2</sub>, ENST00000438167.

Figure S3. Reverse Transcriptase Polymerase Chain Reactions (RT-PCR) Analysis of *PLA2G5* Expression

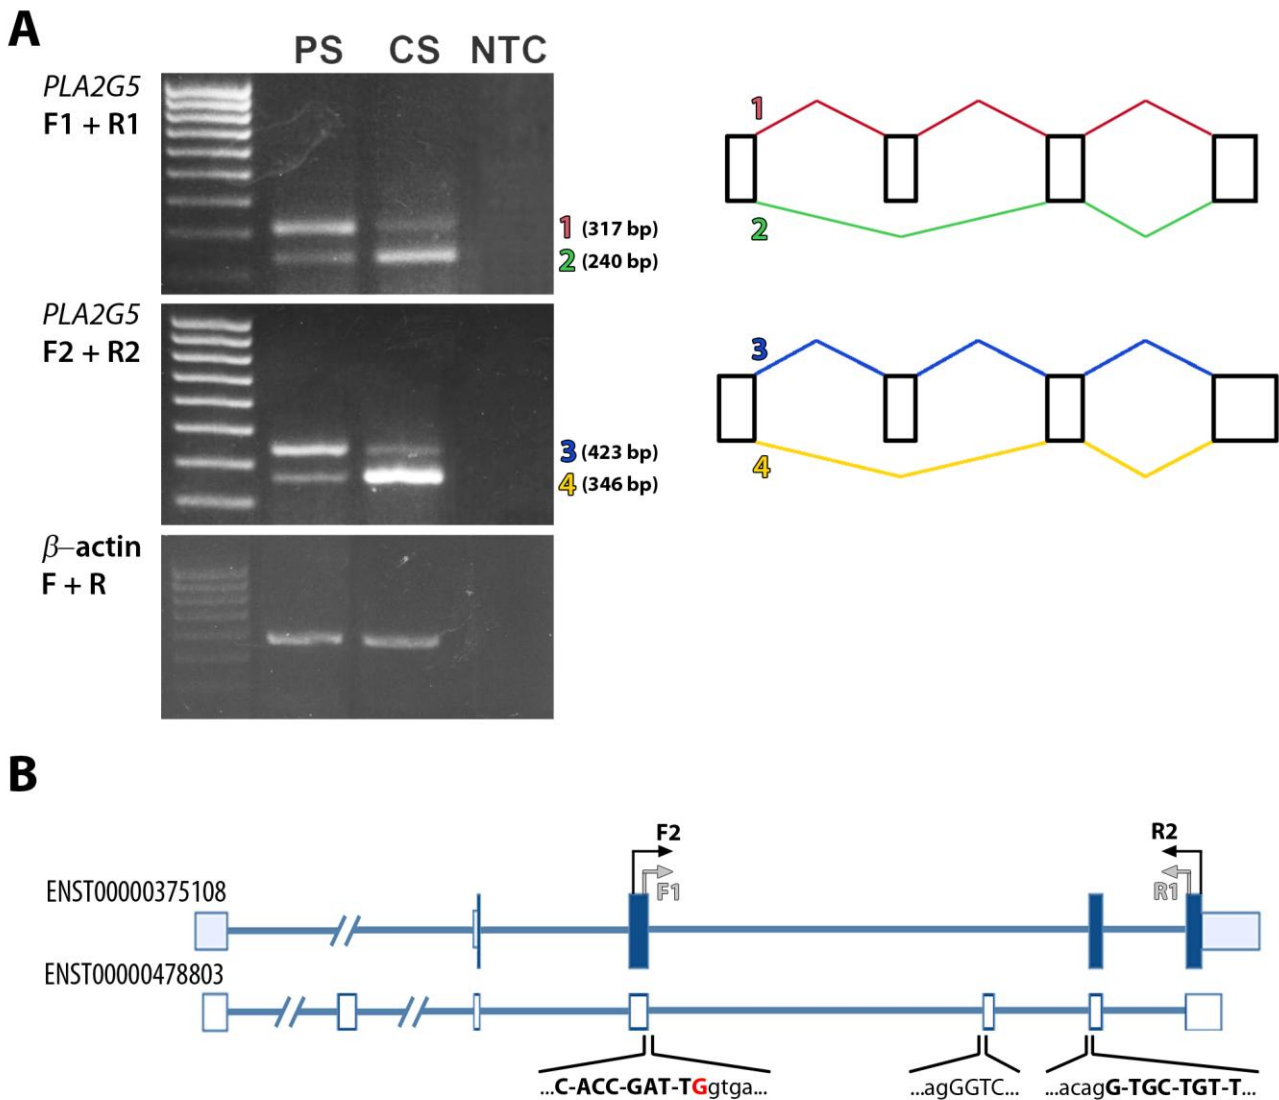

A series of reverse transcriptase polymerase chain reactions (RT-PCR) reactions were performed to assess whether the variant identified in subject K-2, c.185G>A, affects pre-mRNA splicing of the *PLA2G5* transcript *in vivo*. Leukocyte RNA was extracted from whole blood samples collected from patient K-2 and a control sample using a QIAamp RNA blood extraction kit (Qiagen, Crawley, UK) according to the manufacturer's guidelines. cDNA was reverse-transcribed using a cDNA synthesis kit (BioLine, London, UK) with random

hexamer primer mix. RT-PCR reactions were performed using primers and condition listed in Table S4.

A. *PLA2G5* was amplified between exons 3 and 5 using primers RT\_F1 and RT\_R1 (top gel) and primers RT\_F2 and RT\_R2 (middle gel). For both reactions two alternative *PLA2G5* amplicons were detected. The lower bands for each reaction represent the expected segment of protein coding *PLA2G5* transcript (240 bp and 346 bp respectively; Ensembl transcript ENST00000375108). The upper bands represent a segment of a transcript containing an additional alternatively spliced 77 bp exon between exons 3 and 4, previously detected in a non-coding *PLA2G5* transcript (317 bp and 423 bp respectively; Ensembl transcript ENST00000478803). The relative abundance of the two amplicons between PS and CS are consistently different in both reactions; the alternatively spliced exon is detected at a higher level in the PS. A schematic representation of the alternatively spliced products detected is given on the right. The house keeping gene,  $\beta$ -*actin* was also amplified as a positive loading control (bottom gel).

B. Schematic representation of *PLA2G5* protein coding transcript ENST00000375108 and non-coding transcript ENST00000478803. The positions of the *PLA2G5* RT-PCR primers used are highlighted. Nucleotide sequence surrounding the alternatively spliced *PLA2G5* intron-exon boundaries are shown (transcribed sequence in capital, translated sequence in bold font). The position of the mutated nucleotide identified in patient K-2 (c.185 G>A, p.Trp62X) is highlighted in red.

PS, patient sample; CS, control sample; NTC, no template control.

Table S1. Segments of Homozygosity Yielded from Homozygosity Mapping in Families J and K

| <b>Chromosome</b> | <b>From</b>              | <b>To</b>               | <b>Genetic Distance</b><br>(Marshfield linkage map) | <b>Reference</b>             |
|-------------------|--------------------------|-------------------------|-----------------------------------------------------|------------------------------|
| chr1              | 54,742,471 (rs590041)    | 64,361,979 (rs855824)   | 19 cM                                               | Family J,<br>regions > 1 cM  |
| chr2              | 232,025,284 (rs6437002)  | 236,731,624 (rs952608)  | 14 cM                                               |                              |
| chr1              | 20,238,860 (rs3738122)   | 23,266,939 (rs1832047)  | 5 cM                                                |                              |
| chr7              | pter                     | 8,546,068 (rs2189903)   | 15 cM                                               | Family K,<br>regions > 10 cM |
| chr18             | pter                     | 4,925,739 (rs9961128)   | 12 cM                                               |                              |
| chr1              | 18,477,450 (rs10796459)  | 24,578,011 (rs12407356) | 12 cM                                               |                              |
| chr1              | 110,701,174 (rs12118197) | 144,989,739 (rs2590125) | 11 cM                                               |                              |

Genotypes of subjects J-1, J-2, J-3, J-4, J-5, and J-6 were generated using the Genechip Human Mapping 50K Xba Array (Affymetrix, Santa Clara, CA, USA). Genotypes of subject K-2 were generated using the Affymetrix Genome-Wide Human SNP Array 6.0.

Table S2. Primer Sequences and Conditions used for *PLA2G5* Mutation Screening

| Primer             | Sequence (5'-3')                                      | Optimised annealing temperature (°C) <sup>a</sup> | Amplicon size (bp) |
|--------------------|-------------------------------------------------------|---------------------------------------------------|--------------------|
| exon 2F<br>exon 2R | TGACGGGGAGTGGGAATAGATGGG<br>TCTCTACGACCTCAATGGCTGGTGT | 68                                                | 203                |
| exon 3F<br>exon 3R | TTGCACCTCCCTTCCCCTAAT<br>TACTCATCTTCCAGAACTGATATGG    | 68                                                | 343                |
| exon 4F<br>exon 4R | ACACTACCAGATCCTCCCTGCCA<br>TTCTGCACCCAACTCCTCCTC      | 68                                                | 319                |
| exon 5F<br>exon 5R | AGTCCATGGGGTCTCTGCTG<br>AAAGAGGCACCAGCGATCCC          | 68                                                | 681                |

<sup>a</sup>Polymerase chain reactions (PCRs) were performed in a 12.5 µl volume containing 1 Unit Taq polymerase (BIOTAQ DNA Polymerase, Bioline, London, UK). The thermal cycling profile for all reactions was: initial denaturation (94°C for 2 minutes), amplification (35 cycles of: 94°C denaturation for 30 seconds, \*\* °C annealing for 30 seconds, 72°C extension for 30 seconds) and final extension (72 °C for 7 minutes).



Table S3. Summary of Coding *PLA2G5* Sequence Variants Identified Here and Elsewhere

| Coding DNA variants |                         | SIFT           |                          | Polyphen 2 |                       | Blosum 62 score (-4 to 11) | Reference (observed allele count)              |
|---------------------|-------------------------|----------------|--------------------------|------------|-----------------------|----------------------------|------------------------------------------------|
| Nucleotide          | Protein                 | Prediction     | Tolerance index (0 to 1) | Prediction | HumVar Score (0 to 1) |                            |                                                |
| c.9 C>T             | p.(=)                   | not applicable |                          |            |                       | 6                          | 1000G [rs2020887], EVS (1244/3632), this study |
| c.15 C>G            | p.(=)                   | not applicable |                          |            |                       | 4                          | EVS (1/4877)                                   |
| c.48 T>C            | p.(=)                   | not applicable |                          |            |                       | 7                          | EVS (1/4877)                                   |
| c.88 G>A            | p.Glu30Lys              | tolerated      | 0.78                     | Benign     | 0.03                  | 1                          | EVS (1/4877)                                   |
| c.102 G>T           | p.(=)                   | not applicable |                          |            |                       | 6                          | Bushman_pop [rs111762734]                      |
| c.108 C>T           | p.(=)                   | not applicable |                          |            |                       | 6                          | internal db (1/448), EVS (3/4875)              |
| c.110 C>G           | p.Ala37Gly              | tolerated      | 0.35                     | PRD        | 0.97                  | 0                          | EVS (1/4877)                                   |
| <b>c.133 G&gt;T</b> | <b>p.Gly45Cys</b>       | intolerant     | 0.00                     | PRD        | 1.00                  | -3                         | this study [families J and M]                  |
| c.144 C>T           | p.(=)                   | not applicable |                          |            |                       | 9                          | 1000G [rs11573265], EVS (77/4801), this study  |
| <b>c.145 G&gt;A</b> | <b>p.Gly49Ser</b>       | intolerant     | 0.02                     | PRD        | 1.00                  | 0                          | this study [family L]                          |
| <b>c.157 C&gt;T</b> | <b>p.Arg53X</b>         | not applicable |                          |            |                       | -4                         | this study [family L]                          |
| c.181 G>A           | p.Asp61Asn              | intolerant     | 0.01                     | PRD        | 1.00                  | 1                          | EVS (1/4877)                                   |
| <b>c.185 G&gt;A</b> | <b>p.Trp62X</b>         | not applicable |                          |            |                       | -4                         | this study [family K]                          |
| c.292 G>A           | p.Glu98Lys              | intolerant     | 0.04                     | Benign     | 0.47                  | 1                          | EVS (1/4855)                                   |
| c.297 C>T           | p.(=)                   | not applicable |                          |            |                       | 6                          | EVS (2/4876)                                   |
| c.311 A>C           | p.His104Pro             | tolerated      | 0.23                     | Benign     | 0.00                  | -2                         | EVS (1/4877)                                   |
| c.312 T>C           | p.(=)                   | not applicable |                          |            |                       | 8                          | internal db (1/448), EVS (7/4871)              |
| c.368 G>A           | p.Arg123Gln             | tolerated      | 0.53                     | Benign     | 0.10                  | 1                          | EVS (2/4876)                                   |
| <b>c.383delA</b>    | <b>p.Gln128ArgfsX88</b> | not applicable |                          |            |                       | -4                         | this study [family M]                          |
| c.402 C>T           | p.(=)                   | not applicable |                          |            |                       | 6                          | Bushman_pop [rs112000348]                      |
| c.406 C>T           | p.Leu136Phe             | tolerated      | 0.71                     | Benign     | 0.00                  | 0                          | EVS (1/4877)                                   |

SIFT (v4.0.4) results are reported to be tolerant if tolerance index  $\geq 0.05$  or intolerant if tolerance index  $< 0.05$ . Polyphen-2 (v2.1.0r367) appraises mutations qualitatively as Benign, Possibly Damaging or Probably Damaging (PRD) based on the model's false positive rate. Blosum62 substitution matrix score positive numbers indicate a substitution more likely to be tolerated evolutionarily and negative numbers suggest the opposite. The cDNA is numbered according to Ensembl transcript ID ENST00000375108, in which +1 is the A of the translation start codon. Novel changes are in bold font.

EVS denotes variants in the Exome Variant Server, NHLBI Exome Sequencing Project, Seattle, WA, USA [accessed 13/09/2011]. 1000G represents variants identified in the 20101123 sequence and alignment release of the 1000 genomes project (1094 genomes). Bushman\_pop denotes variants identified only among the four Bushmen genomes sequenced by Schuster *et al.*<sup>46</sup> Our internal db contains data from 224 exomes (cases with neurodegenerative disease).

Table S4. Primer Sequences and Conditions Used for Reverse Transcriptase Polymerase Chain Reactions (RT-PCRs)

| Primer                                     | Sequence (5'-3')                             | Optimised annealing temperature (°C) <sup>a</sup> | Amplicon size (bp)                 |
|--------------------------------------------|----------------------------------------------|---------------------------------------------------|------------------------------------|
| PLA2G5_RT_F1<br>PLA2G5_RT_R1               | CCCTGACAAACTACGGCTTC<br>AGTAGACGAGCTTCCGGTCA | 62                                                | 240 <sup>b</sup> /317 <sup>c</sup> |
| PLA2G5_RT_F2<br>PLA2G5_RT_R2               | GAGGCTTGCTGGACCTAAAA<br>GAGGCCTAGGAGCAGAGGAT | 62                                                | 346 <sup>b</sup> /423 <sup>c</sup> |
| $\beta$ -actin_RT_F<br>$\beta$ -actin_RT_R | CTGGGACGACATGGAGAAAA<br>AAGGAAGGCTGGAAGAGTGC | 60                                                | 564                                |

<sup>a</sup>Reverse transcriptase polymerase chain reactions (RT-PCRs) were performed in a 25  $\mu$ l volume containing 2 Units Taq polymerase (BIOTAQ DNA Polymerase, Bioline, London, UK). The thermal cycling profile for all reactions was: initial denaturation (94°C for 2 minutes), amplification (up to 40 cycles of: 94°C denaturation for 30 seconds, \*\* °C annealing for 30 seconds, 72°C extension for 45 seconds) and final extension (72 °C for 7 minutes).

<sup>b</sup>size of PCR amplimer when amplifying Ensembl transcript ENST00000375108.

<sup>c</sup>size of PCR amplimer when amplifying Ensembl transcript ENST00000478803 containing an alternatively spliced 77 bp exon.
